# Supplementary material for: Clinical and Functional Study of a De Novo Variant in the PVP Motif of Kv1.1 Channel Associated with Epilepsy, Developmental Delay and Ataxia
Source: MDPI journal article supplement (doi:10.3390/ijms23158079), 2022-07-22
Supplement: s1 [file s1]

**Table S1.** *KCNA1* mutations associated with ataxia and epilepsy and with DEE

| <b>Mutation</b>                 | <b>Position</b> | <b>Clinical symptoms</b>                                                                                                                                                         | <b>Functional defects</b>                                                                                 | <b>Treatment</b>                                                                                                                                                                         | <b>References</b> |
|---------------------------------|-----------------|----------------------------------------------------------------------------------------------------------------------------------------------------------------------------------|-----------------------------------------------------------------------------------------------------------|------------------------------------------------------------------------------------------------------------------------------------------------------------------------------------------|-------------------|
| <b>F184C</b>                    | S1              | Severe ataxia, severe neuromyotonia, epilepsy, visual disturbances                                                                                                               | LoF, Reduced current density and positive shift of voltage-dependent activation                           | Phenytoin partially effective                                                                                                                                                            | [8]               |
| <b>T226R</b>                    | S2              | Moderate ataxia, severe neuromyotonia, epilepsy, cataplexy, sleep disturbances, skeletal deformities                                                                             | LoF, Reduced current density                                                                              | Acetazolamide and carbamazepine effective; phenytoin, valproic acid and phenobarbital partially effective                                                                                | [7]               |
| <b>A242P</b>                    | S2              | Moderate ataxia, myokymia, epilepsy                                                                                                                                              | LoF, Reduced current density                                                                              | Lamotrigine effective; acetazolamide ineffective                                                                                                                                         | [29]              |
| <b>A261T (de novo)</b>          | S3              | Fever-induced seizures, ataxia, myokymia                                                                                                                                         | GoF, Negative shift of voltage-dependent activation                                                       | Carbamazepine effective, valproate partially effective                                                                                                                                   | [12, 18]          |
| <b>L319R</b>                    | S4-S5           | Paroxysmal kinesigenic dyskinesia without ataxia; in some carriers seizures                                                                                                      | LoF, Reduced current density and dominant-negative effect, positive shift of voltage-dependent activation | Oxcarbazepine or carbamazepine effective                                                                                                                                                 | [9]               |
| <b>R324T</b>                    | S4-S5           | Moderate ataxia, severe neuromyotonia, epilepsy, suspected paroxysmal kinesigenic dyskinesia                                                                                     | LoF, Reduced current density                                                                              | Carbamazepine effective                                                                                                                                                                  | [10]              |
| <b>S342I</b>                    | S5              | Ataxia and seizures                                                                                                                                                              | NA                                                                                                        | Phenytoin effective                                                                                                                                                                      | [11]              |
| <b>V368L</b>                    | S5-S6           | DEE, ataxia, myokymia                                                                                                                                                            | LoF, Non-functional channels                                                                              | Phenobarbital partially effective, valproic acid and oxcarbazepine effective                                                                                                             | [15]              |
| <b>G376S</b>                    | S5-S6           | Seizures, mild cognitive and motor delay, ataxia, myokymia                                                                                                                       | NA                                                                                                        | Valproic acid effective                                                                                                                                                                  | [12]              |
| <b>P403S (de novo) In twins</b> | PVP, S6         | DEE; Twin A: early onset epilepsy, moderate cognitive and motor development delay; ataxia. Twin B: epilepsy, severe intellectual disability, ataxia and myokymia, language loss. | LoF, Non-functional channels                                                                              | Twin A: lamotrigine partially effective. Twin B: drug-resistant seizures. Combinations of valproic acid, vigabatrin, lamotrigine, oxcarbazepine, phenytoin and clobazam poorly effective | [16]              |
| <b>P403A (de novo)</b>          | PVP, S6         | Epilepsy, ataxia and intellectual disability                                                                                                                                     | LoF, Reduced current density and dominant-negative effect, positive shift of voltage-                     | Lacosamide and acetazolamide effective                                                                                                                                                   | This study        |

|                        |         |                                                                                                             |                                                                                                     |                                                                                                                                                                                                                               |          |
|------------------------|---------|-------------------------------------------------------------------------------------------------------------|-----------------------------------------------------------------------------------------------------|-------------------------------------------------------------------------------------------------------------------------------------------------------------------------------------------------------------------------------|----------|
|                        |         |                                                                                                             | dependent activation, slower kinetics of activation                                                 |                                                                                                                                                                                                                               |          |
| <b>P405S (de novo)</b> | PVP, S6 | DEE, cognitive impairment; fever-induced seizures.                                                          | LoF, Markedly reduced current density and marked depolarizing shift of voltage-dependent activation | Drug-resistant seizures. At last follow up treatment comprises: clobazam, carbamazepine, zonisamide and valproic acid poorly effective. Phenobarbital ineffective                                                             | [16]     |
| <b>P405L (de novo)</b> | PVP, S6 | DEE, neonatal onset epilepsy, developmental delay, status epilepticus during sleep (ESES)                   | LoF, Non-functional channels                                                                        | Phenobarbital, carbamazepine, levetiracetam ineffective and phenytoin partially effective. At last follow up treatment comprises: acetazolamide, lamotrigine and valproic acid with seizures control. ESES responsive to ACTH | [16, 17] |
| <b>V408L</b>           | S6      | Global developmental delay, myokymia with postural abnormalities, mild ataxia, seizures                     | LoF, Faster inactivation                                                                            | Carbamazepine or phenytoin effective                                                                                                                                                                                          | [13]     |
| <b>F414C</b>           | C-term  | Moderate episodic ataxia, myokymia, neuromyotonia, isolated photosensitive generalized tonic-clonic seizure | LoF, Non-functional channels and dominant-negative effect                                           | Clonazepam partially effective; acetazolamide and oxcarbazepine ineffective                                                                                                                                                   | [30]     |
| <b>R417Stop</b>        | C-term  | Severe ataxia, dysarthria and slurred speech; periocular myokymia; epilepsy and tremor                      | LoF, Non-functional channels and dominant-negative effect                                           | Carbamazepine and acetazolamide partially effective; lamotrigine, vigabatrin and clonazepam ineffective                                                                                                                       | [31]     |

NA = Not available; DEE = developmental and epileptic encephalopathy; LoF = loss-of-function
